# Supplementary material for: Clinical and genetic insights into non-compaction: a meta-analysis and systematic review on 7598 individuals
Source: Springer Nature journal article supplement (doi:10.1007/s00392-019-01465-3), 2019-04-12
Supplement: MOESM4 [file 16652558]

**Supplemental Table 2: Characteristics of studies investigating left ventricular hypertrabeculation in healthy adults, pregnant women or patients with sickle cell disease**

| Group of individuals | Study | Year | Individuals (n) | Mean age | Male Gender (%) | Black ethnicity (%) | Diagnostic criteria | Fulfilled criteria for LVNC | Showed further hints for non-compaction cardiomyopathy (%) |
| --- | --- | --- | --- | --- | --- | --- | --- | --- | --- |
| Adult athletes | Luijkx et al.  PMID: 777563 | 2012 | 38 | 23±3.8 | 100% | 26.3% | Petersen criteria | 21% | NA |
| Adult athletes | Caselli et al.  PMID: 27561165 | 2016 | 2501 | 25±6 | 62% | 1% | Jenni  criteria | 1.4% | 0.1% |
| Healthy adults | Kawel et al.  PMID: 22499849 | 2012 | 827 | 68.1±8.9 | 44.9% | 25% | Petersen/Kawel criteria | 37% (Petersen)  max. 6% (Kawel) | NA |
| Healthy adults | Tizon-Marcos et al.  PMID: 25132331 | 2014 | 100 | 28±4 | 45% | NA | Jenni/Petersen/Fazio criteria | 18% (Jenni)  13.8% (Petersen)  11% (Fazio) | NA |
| Healthy adults | Weir-McCall et al.  PMID: 27855805 | 2016 | 1480 | 54.1±8.3 | 38% | NA | Petersen/ Weir-McCall criteria | 12.6% (Petersen)  1.3% (Weir-McCall) | NA |
| Healthy adults | Cai et al.  PMID: 29241460 | 2017 | 180 | 45±13 | 50.5% | 0% | Petersen criteria | 7.2% | 5.5% |
| Pregnant women | Gati et al.  PMID: 006201 | 2014 | 102 | 30.7±4.4 | 0% | 54.5% | Chin or Jenni criteria | 18.6% (Chin)  9.8% (Jenni)  7.8% (both) | 0% |
| Sickle cell disease | Gati et al.  PMID: 23582434 | 2013 | 99 | 33±11 | 53% | 100% | Chin or Jenni criteria | 20.8% (Chin)  10% (Jenni)  8.1% (both) | 5% |

NA: not available
