# Supplementary material for: Clinical and genetic insights into non-compaction: a meta-analysis and systematic review on 7598 individuals
Source: Springer Nature journal article supplement (doi:10.1007/s00392-019-01465-3), 2019-04-12
Supplement: MOESM5 [file 16652558]

**Supplemental Table 3: Frequency of mutations in *TTN*, *MYH7*, and *MYBPC3* in index patients based on family history for cardiomyopathy**

| Study | Genes | Patients with positive family history for cardiomyopathy | Patients without family history for cardiomyopathy |
| --- | --- | --- | --- |
| Klaassen et al.  PMID: 18506004 | *MYH7* | 4 (50%) | 4 (50%) |
| Tian et al.  PMID: 24691700 | *MYH7* | 2 (50%) | 2 (50%) |
| Sedaghat-Hamedani et al.  PMID: 29029073 | *TTN* | 4 (30.7%) | 9 (69.3%) |
|  | *MYH7* | 2 (100%) | - |
|  | *MYBPC3* | 3 (100%) | - |
